# Supplementary material for: Switchable ionic liquids enable efficient nanofibrillation of wood pulp
Source: Springer Nature journal article supplement (doi:10.1007/s10570-017-1354-2), 2017-06-06
Supplement: MOESM1 [file 12341792]

## Supplementary files

### Online Resource 1

Chemical composition and mass balance of native and SIL treated as well as the bleached woody material obtained after treatment of birch with the SIL. The reference material is included \*, \*\*.

| Source                                                   | Cellulose<br>wt-% (g) | Hemicellulose<br>wt-% (g) | Lignin<br>wt-% (g) | Total<br>wt-% (g) |
|----------------------------------------------------------|-----------------------|---------------------------|--------------------|-------------------|
| Native birch                                             | <b>42</b> (12.6)      | <b>32</b> (9.6)           | <b>22</b> (6.6)    | <b>96</b> (28.8)  |
| DBUMEASO <sub>2</sub> SIL treated<br>birch chip          | <b>75</b> (22.5)      | <b>20</b> (6.0)           | <b>5</b> (1.4)     | <b>100</b> (29.9) |
| DBUMEASO <sub>2</sub> SIL treated<br>birch chip bleached | <b>83</b> (24.8)      | <b>13</b> (4.0)           | <b>2</b> (0.5)     | <b>98</b> (29.3)  |
| Reference                                                | <b>70</b> (0.7)       | <b>21</b> (0.2)           | <b>5</b> (0.1)     | <b>96</b> (1.0)   |

\* The amount in parenthesis corresponds to the amount of the undissolved wood material. The inability to close the initial mass balance is obvious; the ash elements and the wood extractives are not considered in the calculation. Furthermore, the deviations for the values presented are  $\sim\pm 4$ wt-%.

\*\*The values in parentheses represent the amount of each component recovered from the 50 g total wood minus weight loss from the treatment. The values presented for the reference are for 1 gram of sample.
